# Supplementary material for: A Novel Computational Method Identifies Intra- and Inter-Species Recombination Events in Staphylococcus aureus and Streptococcus pneumoniae
Source: PLoS Comput Biol. 2012 Sep 6;8(9):e1002668. doi: 10.1371/journal.pcbi.1002668 (PMC3435249; doi:10.1371/journal.pcbi.1002668)
Supplement: Table S4 — Recombination breakpoint positions of TW20. The first column reports the gene name of the potential recombination position in the test genome TW20, the second column the reference genome and the third column the corresponding p-value of the Fisher test. (XLS) [file pcbi.1002668.s009.xls]

## Sheet: Sheet1
Gi test genome	Reference genome	p-value
gi|269939839|emb|CBI48208.1|	0402981	5.55333e-12
gi|269939880|emb|CBI48251.1|	0402981	4.11358e-13
gi|269939916|emb|CBI48287.1|	0402981	0.00163083
gi|269939941|emb|CBI48313.1|	0402981	0.00163083
gi|269940168|emb|CBI48544.1|	0402981	0.00962513
gi|269940200|emb|CBI48577.1|	0402981	4.11358e-13
gi|269940251|emb|CBI48628.1|	0402981	5.18311e-11
gi|269940333|emb|CBI48710.1|	0402981	0.0222898
gi|269940358|emb|CBI48735.1|	0402981	0.0222898
gi|269940382|emb|CBI48759.1|	0402981	0.0222898
gi|269940659|emb|CBI49038.1|	0402981	0.00402912
gi|269940681|emb|CBI49060.1|	0402981	0.0420781
gi|269940708|emb|CBI49089.1|	0402981	0.0186284
gi|269940738|emb|CBI49119.1|	0402981	0.0105805
gi|269941116|emb|CBI49502.1|	0402981	2.9309e-05
gi|269941141|emb|CBI49528.1|	0402981	2.9309e-05
gi|269941422|emb|CBI49819.1|	0402981	5.18311e-11
gi|269941467|emb|CBI49864.1|	0402981	5.18311e-11
gi|269941491|emb|CBI49889.1|	0402981	8.56724e-05
gi|269941504|emb|CBI49902.1|	0402981	8.56724e-05
gi|269941797|emb|CBI50206.1|	0402981	0.000238659
gi|269941858|emb|CBI50268.1|	0402981	2.19668e-07
gi|269942040|emb|CBI50452.1|	0402981	0.00402912
gi|269939549|emb|CBI47907.1|	091751	0.0222898
gi|269939597|emb|CBI47963.1|	091751	0.00962513
gi|269939999|emb|CBI48375.1|	091751	0.0222898
gi|270119427|emb|CBI67632.1|	091751	0.0222898
gi|269940161|emb|CBI48537.1|	091751	0.00402912
gi|269940247|emb|CBI48624.1|	091751	0.032157
gi|269940272|emb|CBI48649.1|	091751	8.56724e-05
gi|269940592|emb|CBI48971.1|	091751	0.00962513
gi|269940626|emb|CBI49005.1|	091751	0.010122
gi|269940652|emb|CBI49031.1|	091751	2.19668e-07
gi|269940787|emb|CBI49169.1|	091751	0.0222898
gi|269940816|emb|CBI49198.1|	091751	0.0222898
gi|269940999|emb|CBI49383.1|	091751	5.55333e-12
gi|269941048|emb|CBI49432.1|	091751	5.55333e-12
gi|269941111|emb|CBI49497.1|	091751	0.000238659
gi|269941145|emb|CBI49532.1|	091751	8.56724e-05
gi|269941419|emb|CBI49816.1|	091751	0.000636424
gi|269941444|emb|CBI49841.1|	091751	0.000636424
gi|269941468|emb|CBI49865.1|	091751	0.0222898
gi|269941504|emb|CBI49902.1|	091751	0.000238659
gi|269941647|emb|CBI50053.1|	091751	5.55333e-12
gi|269941674|emb|CBI50081.1|	091751	5.55333e-12
gi|269941747|emb|CBI50155.1|	091751	9.50562e-06
gi|269941796|emb|CBI50205.1|	091751	9.50562e-06
gi|269939558|emb|CBI47918.1|	103564	3.75775e-10
gi|269939609|emb|CBI47975.1|	103564	5.55333e-12
gi|269940166|emb|CBI48542.1|	103564	7.17861e-09
gi|269940193|emb|CBI48570.1|	103564	0.000903819
gi|269940230|emb|CBI48607.1|	103564	0.012116
gi|269940355|emb|CBI48732.1|	103564	5.18311e-11
gi|269940414|emb|CBI48791.1|	103564	1.06994e-09
gi|269940492|emb|CBI48869.1|	103564	4.11358e-13
gi|269940531|emb|CBI48910.1|	103564	9.50562e-06
gi|269940568|emb|CBI48947.1|	103564	0.000101921
gi|269940602|emb|CBI48981.1|	103564	0.00461407
gi|269940625|emb|CBI49004.1|	103564	8.29855e-07
gi|269940729|emb|CBI49110.1|	103564	0.000903819
gi|269940784|emb|CBI49166.1|	103564	0.00156716
gi|269940844|emb|CBI49226.1|	103564	0.0222898
gi|269940941|emb|CBI49325.1|	103564	3.66368e-07
gi|269940977|emb|CBI49361.1|	103564	0.00192151
gi|269940994|emb|CBI49378.1|	103564	0.00366523
gi|269941034|emb|CBI49418.1|	103564	0.00406232
gi|269941079|emb|CBI49463.1|	103564	1.1649e-08
gi|269941110|emb|CBI49496.1|	103564	1.06994e-09
gi|269941144|emb|CBI49531.1|	103564	2.25465e-09
gi|269941210|emb|CBI49598.1|	103564	5.18311e-11
gi|269941258|emb|CBI49647.1|	103564	7.13196e-08
gi|269941365|emb|CBI49762.1|	103564	5.32528e-08
gi|269941403|emb|CBI49800.1|	103564	0.000166373
gi|269941467|emb|CBI49864.1|	103564	8.56724e-05
gi|269941501|emb|CBI49899.1|	103564	0.00163083
gi|269941544|emb|CBI49949.1|	103564	0.00163083
gi|269941647|emb|CBI50053.1|	103564	0.00962513
gi|269941671|emb|CBI50078.1|	103564	0.0487971
gi|269941696|emb|CBI50103.1|	103564	1.06994e-09
gi|269941749|emb|CBI50157.1|	103564	5.55333e-12
gi|269941768|emb|CBI50176.1|	103564	0.0487971
gi|269941856|emb|CBI50266.1|	103564	1.90142e-07
gi|269941953|emb|CBI50364.1|	103564	9.50562e-06
gi|269941978|emb|CBI50390.1|	103564	0.00715037
gi|269942038|emb|CBI50450.1|	103564	3.75775e-10
gi|269942063|emb|CBI50475.1|	103564	4.11358e-13
gi|269942097|emb|CBI50510.1|	103564	0.000636424
gi|269942121|emb|CBI50534.1|	103564	2.90449e-06
gi|269939554|emb|CBI47913.1|	122051	8.0212e-07
gi|269939608|emb|CBI47974.1|	122051	0.000166373
gi|269939662|emb|CBI48030.1|	122051	4.90216e-07
gi|269939731|emb|CBI48099.1|	122051	5.18311e-11
gi|269939765|emb|CBI48133.1|	122051	9.54565e-06
gi|269939793|emb|CBI48161.1|	122051	0.00366523
gi|269939815|emb|CBI48183.1|	122051	0.000238659
gi|269939839|emb|CBI48208.1|	122051	4.11358e-13
gi|269942108|emb|CBI50521.1|	122051	0.0222898
gi|269942146|emb|CBI50559.1|	122051	0.0420781
gi|269942161|emb|CBI50575.1|	122051	0.00366523
gi|269942181|emb|CBI50595.1|	122051	0.012116
gi|269942229|emb|CBI50643.1|	122051	0.0222898
gi|269942245|emb|CBI50659.1|	122051	0.0222898
gi|269939900|emb|CBI48271.1|	132	5.55333e-12
gi|269940390|emb|CBI48767.1|	132	2.90449e-06
gi|269940415|emb|CBI48792.1|	132	2.90449e-06
gi|269941444|emb|CBI49841.1|	132	0.00163083
gi|269941469|emb|CBI49866.1|	132	0.00163083
gi|269941503|emb|CBI49901.1|	132	4.11358e-13
gi|269941647|emb|CBI50053.1|	132	4.11358e-13
gi|269941797|emb|CBI50206.1|	132	0.000636424
gi|269942122|emb|CBI50535.1|	132	4.11358e-13
gi|269939560|emb|CBI47921.1|	A5937	2.90449e-06
gi|269939614|emb|CBI47980.1|	A5937	2.19668e-07
gi|269939853|emb|CBI48223.1|	A5937	0.00402912
gi|269939878|emb|CBI48249.1|	A5937	0.00402912
gi|269940016|emb|CBI48392.1|	A5937	8.29855e-07
gi|269940037|emb|CBI48413.1|	A5937	1.05929e-05
gi|269940083|emb|CBI48459.1|	A5937	0.000636424
gi|269940131|emb|CBI48507.1|	A5937	0.00192151
gi|269940333|emb|CBI48710.1|	A5937	0.0222898
gi|269940358|emb|CBI48735.1|	A5937	0.0222898
gi|269941061|emb|CBI49445.1|	A5937	0.0222898
gi|269941130|emb|CBI49516.1|	A5937	8.56724e-05
gi|269941143|emb|CBI49530.1|	A5937	8.56724e-05
gi|269941487|emb|CBI49885.1|	A5937	8.56724e-05
gi|269941504|emb|CBI49902.1|	A5937	8.56724e-05
gi|269941791|emb|CBI50200.1|	A5937	0.00962513
gi|269941840|emb|CBI50250.1|	A5937	0.00962513
gi|269941977|emb|CBI50389.1|	A5937	0.000238659
gi|269942040|emb|CBI50452.1|	A5937	0.000286753
gi|269939527|emb|CBA12169.1|	Btn1260	0.00829863
gi|269939551|emb|CBI47909.1|	Btn1260	5.55333e-12
gi|269939592|emb|CBI47957.1|	Btn1260	0.00962513
gi|269939616|emb|CBI47982.1|	Btn1260	0.00962513
gi|269939766|emb|CBI48134.1|	Btn1260	2.25465e-09
gi|269939815|emb|CBI48183.1|	Btn1260	1.1649e-08
gi|269939866|emb|CBI48236.1|	Btn1260	2.9309e-05
gi|269939916|emb|CBI48287.1|	Btn1260	9.50562e-06
gi|269941393|emb|CBI49790.1|	Btn1260	0.00402912
gi|269941442|emb|CBI49839.1|	Btn1260	0.00402912
gi|269941794|emb|CBI50203.1|	Btn1260	0.00962513
gi|269941843|emb|CBI50253.1|	Btn1260	0.00962513
gi|269942121|emb|CBI50534.1|	Btn1260	8.56724e-05
gi|269942217|emb|CBI50631.1|	Btn1260	0.00402912
gi|269942241|emb|CBI50655.1|	Btn1260	4.11358e-13
gi|269942277|emb|CBI50692.1|	Btn1260	0.0254766
gi|269939605|emb|CBI47971.1|	68397	0.0156526
gi|269939655|emb|CBI48023.1|	68397	2.19668e-07
gi|269939839|emb|CBI48208.1|	68397	4.11358e-13
gi|269939875|emb|CBI48246.1|	68397	0.000636424
gi|269939900|emb|CBI48271.1|	68397	0.000636424
gi|269942122|emb|CBI50535.1|	68397	2.90449e-06
gi|269942143|emb|CBI50556.1|	68397	0.000286753
gi|269939540|emb|CBI47898.1|	JKD6008	0.000286753
gi|269939559|emb|CBI47919.1|	JKD6008	0.000111876
gi|269939609|emb|CBI47975.1|	JKD6008	3.75775e-10
gi|269939866|emb|CBI48236.1|	JKD6008	2.90449e-06
gi|269939891|emb|CBI48262.1|	JKD6008	2.90449e-06
gi|269941496|emb|CBI49894.1|	JKD6008	8.29855e-07
gi|269941542|emb|CBI49943.1|	JKD6008	0.000636424
gi|269941647|emb|CBI50053.1|	JKD6008	4.11358e-13
gi|269941797|emb|CBI50206.1|	JKD6008	2.9309e-05
gi|269941822|emb|CBI50232.1|	JKD6008	0.0156526
gi|269939857|emb|CBI48227.1|	A9765	8.56724e-05
gi|269939900|emb|CBI48271.1|	A9765	2.19668e-07
gi|269940394|emb|CBI48771.1|	A9765	2.25465e-09
gi|269940419|emb|CBI48796.1|	A9765	2.25465e-09
gi|269940859|emb|CBI49241.1|	A9765	0.000762034
gi|269941432|emb|CBI49829.1|	A9765	4.11358e-13
gi|269941461|emb|CBI49858.1|	A9765	4.11358e-13
gi|269941499|emb|CBI49897.1|	A9765	3.75775e-10
gi|269941647|emb|CBI50053.1|	A9765	4.11358e-13
gi|269942121|emb|CBI50534.1|	A9765	4.11358e-13
gi|269939614|emb|CBI47980.1|	A9719	0.00402912
gi|269939839|emb|CBI48208.1|	A9719	5.18311e-11
gi|269939869|emb|CBI48240.1|	A9719	5.18311e-11
gi|269940976|emb|CBI49360.1|	A9719	2.19668e-07
gi|269941001|emb|CBI49385.1|	A9719	2.19668e-07
gi|269941064|emb|CBI49448.1|	A9719	0.00163083
gi|269941089|emb|CBI49475.1|	A9719	0.0105805
gi|269941113|emb|CBI49499.1|	A9719	0.000286753
gi|269941141|emb|CBI49528.1|	A9719	2.9309e-05
gi|269941488|emb|CBI49886.1|	A9719	8.56724e-05
gi|269941504|emb|CBI49902.1|	A9719	8.56724e-05
gi|269941858|emb|CBI50268.1|	A9719	0.000636424
gi|269941985|emb|CBI50397.1|	A9719	8.29855e-07
gi|269942031|emb|CBI50443.1|	A9719	6.30991e-06
gi|269939907|emb|CBI48278.1|	TCH130	8.29855e-07
gi|269939951|emb|CBI48324.1|	TCH130	9.50562e-06
gi|269939993|emb|CBI48369.1|	TCH130	0.00163083
gi|269940018|emb|CBI48394.1|	TCH130	0.00163083
gi|269940039|emb|CBI48415.1|	TCH130	1.1649e-08
gi|269940077|emb|CBI48453.1|	TCH130	0.010122
gi|269940149|emb|CBI48525.1|	TCH130	1.1649e-08
gi|269940173|emb|CBI48549.1|	TCH130	0.0222898
gi|269940189|emb|CBI48566.1|	TCH130	0.0222898
gi|269940213|emb|CBI48590.1|	TCH130	0.00962513
gi|269940264|emb|CBI48641.1|	TCH130	0.000762034
gi|269940356|emb|CBI48733.1|	TCH130	3.75775e-10
gi|269940415|emb|CBI48792.1|	TCH130	5.18311e-11
gi|269940478|emb|CBI48855.1|	TCH130	5.55333e-12
gi|269940581|emb|CBI48960.1|	TCH130	1.06994e-09
gi|269940731|emb|CBI49112.1|	TCH130	2.9309e-05
gi|269940771|emb|CBI49153.1|	TCH130	0.000238659
gi|269940912|emb|CBI49296.1|	TCH130	0.0487971
gi|269940921|emb|CBI49305.1|	TCH130	0.000762034
gi|269940973|emb|CBI49357.1|	TCH130	1.1649e-08
gi|269941067|emb|CBI49451.1|	TCH130	2.25465e-09
gi|269941117|emb|CBI49503.1|	TCH130	1.23819e-10
gi|269941217|emb|CBI49605.1|	TCH130	3.66368e-07
gi|269941265|emb|CBI49655.1|	TCH130	5.18311e-11
gi|269941290|emb|CBI49685.1|	TCH130	0.0374297
gi|269941307|emb|CBI49704.1|	TCH130	0.00163083
gi|269941420|emb|CBI49817.1|	TCH130	5.55333e-12
gi|269941465|emb|CBI49862.1|	TCH130	3.75775e-10
gi|269941858|emb|CBI50268.1|	TCH130	1.90142e-07
gi|269941885|emb|CBI50295.1|	TCH130	1.05929e-05
gi|269941929|emb|CBI50340.1|	TCH130	2.25465e-09
gi|269941966|emb|CBI50377.1|	TCH130	5.32528e-08
gi|269942037|emb|CBI50449.1|	TCH130	0.00461407
gi|269939560|emb|CBI47921.1|	A6224	2.90449e-06
gi|269939614|emb|CBI47980.1|	A6224	2.19668e-07
gi|269939839|emb|CBI48208.1|	A6224	5.55333e-12
gi|269939898|emb|CBI48269.1|	A6224	5.18311e-11
gi|269940749|emb|CBI49131.1|	A6224	0.0156526
gi|269940774|emb|CBI49156.1|	A6224	0.000286753
gi|269941061|emb|CBI49445.1|	A6224	0.0222898
gi|269941116|emb|CBI49502.1|	A6224	0.000286753
gi|269941141|emb|CBI49528.1|	A6224	2.9309e-05
gi|269941407|emb|CBI49804.1|	A6224	0.00461407
gi|269941439|emb|CBI49836.1|	A6224	0.00305107
gi|269941469|emb|CBI49866.1|	A6224	9.50562e-06
gi|269941797|emb|CBI50206.1|	A6224	0.000636424
gi|269941858|emb|CBI50268.1|	A6224	8.29855e-07
gi|269939920|emb|CBI48291.1|	MR1	2.9309e-05
gi|269939945|emb|CBI48317.1|	MR1	2.9309e-05
gi|269940038|emb|CBI48414.1|	MR1	5.32528e-08
gi|269940065|emb|CBI48441.1|	MR1	6.30991e-06
gi|269940112|emb|CBI48488.1|	MR1	0.0222898
gi|269940134|emb|CBI48510.1|	MR1	7.17861e-09
gi|269940167|emb|CBI48543.1|	MR1	5.55333e-12
gi|269940412|emb|CBI48789.1|	MR1	0.0222898
gi|269940461|emb|CBI48838.1|	MR1	0.0222898
gi|269940513|emb|CBI48891.1|	MR1	0.000238659
gi|269940546|emb|CBI48925.1|	MR1	0.000331219
gi|269940593|emb|CBI48972.1|	MR1	0.00402912
gi|269940652|emb|CBI49031.1|	MR1	0.000238659
gi|269940865|emb|CBI49247.1|	MR1	0.000636424
gi|269940913|emb|CBI49297.1|	MR1	0.00962513
gi|269941064|emb|CBI49448.1|	MR1	0.00163083
gi|269941106|emb|CBI49492.1|	MR1	0.00402912
gi|269941427|emb|CBI49824.1|	MR1	0.0222898
gi|269941479|emb|CBI49876.1|	MR1	1.15491e-05
gi|269941504|emb|CBI49902.1|	MR1	3.75775e-10
gi|269941637|emb|CBI50043.1|	MR1	0.00402912
gi|269941662|emb|CBI50069.1|	MR1	0.00402912
gi|269941745|emb|CBI50152.1|	MR1	2.9309e-05
gi|269941797|emb|CBI50206.1|	MR1	0.00461407
gi|269941846|emb|CBI50256.1|	MR1	3.75775e-10
gi|269942049|emb|CBI50461.1|	MR1	3.75775e-10
gi|269942074|emb|CBI50487.1|	MR1	7.17861e-09
gi|269942109|emb|CBI50522.1|	MR1	0.00962513
gi|269941409|emb|CBI49806.1|	RF122	9.50562e-06
gi|269941434|emb|CBI49831.1|	RF122	9.50562e-06
gi|269939549|emb|CBI47907.1|	WBG10049	1.1649e-08
gi|269939671|emb|CBI48039.1|	WBG10049	1.1649e-08
gi|269939766|emb|CBI48134.1|	WBG10049	0.00305107
gi|269939795|emb|CBI48163.1|	WBG10049	0.0186284
gi|269939815|emb|CBI48183.1|	WBG10049	2.9309e-05
gi|269939839|emb|CBI48208.1|	WBG10049	4.11358e-13
gi|269939866|emb|CBI48236.1|	WBG10049	0.00402912
gi|269939891|emb|CBI48262.1|	WBG10049	0.00402912
gi|269942145|emb|CBI50558.1|	WBG10049	0.00715037
gi|269942161|emb|CBI50575.1|	WBG10049	0.00959505
gi|269942181|emb|CBI50595.1|	WBG10049	8.56724e-05
gi|269939568|emb|CBI47929.1|	M1015	0.00305107
gi|269939616|emb|CBI47982.1|	M1015	0.000238659
gi|269939839|emb|CBI48208.1|	M1015	4.11358e-13
gi|269939875|emb|CBI48246.1|	M1015	0.000636424
gi|269939900|emb|CBI48271.1|	M1015	0.000636424
gi|269942122|emb|CBI50535.1|	M1015	4.11358e-13
gi|269939839|emb|CBI48208.1|	ED98	0.00962513
gi|269939864|emb|CBI48234.1|	ED98	0.00962513
gi|269940040|emb|CBI48416.1|	ED98	0.000636424
gi|269940065|emb|CBI48441.1|	ED98	0.0180769
gi|269940119|emb|CBI48495.1|	ED98	0.00962513
gi|269940463|emb|CBI48840.1|	ED98	9.50562e-06
gi|269940478|emb|CBI48855.1|	ED98	0.0254766
gi|269940514|emb|CBI48892.1|	ED98	0.00402912
gi|269940585|emb|CBI48964.1|	ED98	0.00962513
gi|269940634|emb|CBI49013.1|	ED98	0.00962513
gi|269940750|emb|CBI49132.1|	ED98	0.00148816
gi|269940775|emb|CBI49157.1|	ED98	0.00543563
gi|269940788|emb|CBI49170.1|	ED98	0.00163083
gi|269941477|emb|CBI49874.1|	ED98	4.11358e-13
gi|269941503|emb|CBI49901.1|	ED98	4.11358e-13
gi|269941653|emb|CBI50059.1|	ED98	1.05929e-05
gi|269941678|emb|CBI50085.1|	ED98	8.29855e-07
gi|269941794|emb|CBI50203.1|	ED98	3.75775e-10
gi|269941843|emb|CBI50253.1|	ED98	5.32528e-08
gi|269941977|emb|CBI50389.1|	ED98	9.50562e-06
gi|269942040|emb|CBI50452.1|	ED98	2.9309e-05
gi|269939616|emb|CBI47982.1|	C101	0.00962513
gi|269939839|emb|CBI48208.1|	C101	4.11358e-13
gi|269939877|emb|CBI48248.1|	C101	8.56724e-05
gi|269939902|emb|CBI48273.1|	C101	8.56724e-05
gi|269942165|emb|CBI50579.1|	C101	1.1649e-08
gi|269939538|emb|CBI47896.1|	JKD6009	1.05929e-05
gi|269939559|emb|CBI47919.1|	JKD6009	0.012116
gi|269939568|emb|CBI47929.1|	JKD6009	0.0254766
gi|269939609|emb|CBI47975.1|	JKD6009	3.75775e-10
gi|269939866|emb|CBI48236.1|	JKD6009	2.25465e-09
gi|269939892|emb|CBI48263.1|	JKD6009	2.25465e-09
gi|269941496|emb|CBI49894.1|	JKD6009	8.29855e-07
gi|269941542|emb|CBI49943.1|	JKD6009	0.000636424
gi|269941647|emb|CBI50053.1|	JKD6009	4.11358e-13
gi|269941797|emb|CBI50206.1|	JKD6009	2.9309e-05
gi|269941822|emb|CBI50232.1|	JKD6009	0.0156526
gi|269940017|emb|CBI48393.1|	A8117	0.0222898
gi|269940025|emb|CBI48401.1|	A8117	0.0222898
gi|269940341|emb|CBI48718.1|	A8117	0.00962513
gi|269940365|emb|CBI48742.1|	A8117	0.0487971
gi|269940484|emb|CBI48861.1|	A8117	0.0222898
gi|269940514|emb|CBI48892.1|	A8117	0.00402912
gi|269940585|emb|CBI48964.1|	A8117	0.00962513
gi|269940652|emb|CBI49031.1|	A8117	0.000238659
gi|269941061|emb|CBI49445.1|	A8117	0.0222898
gi|269941393|emb|CBI49790.1|	A8117	0.000762034
gi|269941464|emb|CBI49861.1|	A8117	5.18311e-11
gi|269941503|emb|CBI49901.1|	A8117	4.11358e-13
gi|269941646|emb|CBI50052.1|	A8117	2.90449e-06
gi|269941679|emb|CBI50086.1|	A8117	2.19668e-07
gi|269941977|emb|CBI50389.1|	A8117	8.56724e-05
gi|269942031|emb|CBI50443.1|	A8117	0.000209758
gi|269939916|emb|CBI48287.1|	MW2	0.0222898
gi|269939923|emb|CBI48294.1|	MW2	0.0222898
gi|269940065|emb|CBI48441.1|	MW2	1.05929e-05
gi|269940114|emb|CBI48490.1|	MW2	0.0180769
gi|269940173|emb|CBI48549.1|	MW2	0.00402912
gi|269940250|emb|CBI48627.1|	MW2	9.50562e-06
gi|269940284|emb|CBI48661.1|	MW2	0.00144155
gi|269940329|emb|CBI48706.1|	MW2	9.50562e-06
gi|269940394|emb|CBI48771.1|	MW2	8.29855e-07
gi|269940455|emb|CBI48832.1|	MW2	0.00148816
gi|269940476|emb|CBI48853.1|	MW2	0.0254766
gi|269940479|emb|CBI48856.1|	MW2	0.0374297
gi|269940492|emb|CBI48869.1|	MW2	0.000238659
gi|269940577|emb|CBI48956.1|	MW2	1.1649e-08
gi|269940646|emb|CBI49025.1|	MW2	0.010122
gi|269940659|emb|CBI49038.1|	MW2	0.00156716
gi|269940683|emb|CBI49062.1|	MW2	0.00962513
gi|269940707|emb|CBI49088.1|	MW2	2.25465e-09
gi|269940733|emb|CBI49114.1|	MW2	0.000146579
gi|269940753|emb|CBI49135.1|	MW2	0.00163083
gi|269940819|emb|CBI49201.1|	MW2	4.11358e-13
gi|269940865|emb|CBI49247.1|	MW2	2.19668e-07
gi|269940926|emb|CBI49310.1|	MW2	8.56724e-05
gi|269941046|emb|CBI49430.1|	MW2	0.0186284
gi|269941110|emb|CBI49496.1|	MW2	0.00120859
gi|269941143|emb|CBI49530.1|	MW2	2.25465e-09
gi|269941194|emb|CBI49582.1|	MW2	0.000238659
gi|269941213|emb|CBI49601.1|	MW2	1.61809e-06
gi|269941258|emb|CBI49647.1|	MW2	7.13196e-08
gi|269941380|emb|CBI49777.1|	MW2	5.18311e-11
gi|269941447|emb|CBI49844.1|	MW2	8.56724e-05
gi|269941469|emb|CBI49866.1|	MW2	8.56724e-05
gi|269941676|emb|CBI50083.1|	MW2	4.11358e-13
gi|269941742|emb|CBI50149.1|	MW2	3.66368e-07
gi|269941861|emb|CBI50271.1|	MW2	0.000238659
gi|269942036|emb|CBI50448.1|	MW2	3.75775e-10
gi|269942061|emb|CBI50473.1|	MW2	3.75775e-10
gi|269939560|emb|CBI47921.1|	A6300	2.90449e-06
gi|269939614|emb|CBI47980.1|	A6300	2.19668e-07
gi|269939862|emb|CBI48232.1|	A6300	3.75775e-10
gi|269939898|emb|CBI48269.1|	A6300	5.55333e-12
gi|269941479|emb|CBI49876.1|	A6300	0.000636424
gi|269941504|emb|CBI49902.1|	A6300	0.000636424
gi|269941797|emb|CBI50206.1|	A6300	0.000238659
gi|269941846|emb|CBI50256.1|	A6300	0.000238659
gi|269939593|emb|CBI47958.1|	TCH70	0.0222898
gi|269940061|emb|CBI48437.1|	TCH70	0.0222898
gi|269940167|emb|CBI48543.1|	TCH70	4.11358e-13
gi|269940198|emb|CBI48575.1|	TCH70	4.11358e-13
gi|269940252|emb|CBI48629.1|	TCH70	9.50562e-06
gi|269940272|emb|CBI48649.1|	TCH70	3.40241e-05
gi|269940350|emb|CBI48727.1|	TCH70	2.25465e-09
gi|269940388|emb|CBI48765.1|	TCH70	8.56724e-05
gi|269940423|emb|CBI48800.1|	TCH70	0.032157
gi|269940577|emb|CBI48956.1|	TCH70	1.1649e-08
gi|269940627|emb|CBI49006.1|	TCH70	0.0222413
gi|269940647|emb|CBI49026.1|	TCH70	0.00192151
gi|269940705|emb|CBI49086.1|	TCH70	0.00402912
gi|269940753|emb|CBI49135.1|	TCH70	0.00962513
gi|269940819|emb|CBI49201.1|	TCH70	5.55333e-12
gi|269940864|emb|CBI49246.1|	TCH70	1.06994e-09
gi|269940889|emb|CBI49272.1|	TCH70	0.000209758
gi|269940929|emb|CBI49313.1|	TCH70	2.90449e-06
gi|269940953|emb|CBI49337.1|	TCH70	0.00402912
gi|269940980|emb|CBI49364.1|	TCH70	0.00962513
gi|269941004|emb|CBI49388.1|	TCH70	2.9309e-05
gi|269941024|emb|CBI49408.1|	TCH70	0.00543563
gi|269941046|emb|CBI49430.1|	TCH70	0.00543563
gi|269941080|emb|CBI49465.1|	TCH70	0.00361372
gi|269941125|emb|CBI49511.1|	TCH70	0.00962513
gi|269941149|emb|CBI49536.1|	TCH70	9.50562e-06
gi|269941179|emb|CBI49567.1|	TCH70	0.000636424
gi|269941203|emb|CBI49591.1|	TCH70	4.11358e-13
gi|269941276|emb|CBI49666.1|	TCH70	8.29855e-07
gi|269941307|emb|CBI49704.1|	TCH70	0.00163083
gi|269941377|emb|CBI49774.1|	TCH70	8.56724e-05
gi|269941408|emb|CBI49805.1|	TCH70	0.012116
gi|269941423|emb|CBI49820.1|	TCH70	0.000238659
gi|269941447|emb|CBI49844.1|	TCH70	2.9309e-05
gi|269941469|emb|CBI49866.1|	TCH70	2.9309e-05
gi|269941692|emb|CBI50099.1|	TCH70	2.9309e-05
gi|269941752|emb|CBI50160.1|	TCH70	0.00366523
gi|269941803|emb|CBI50212.1|	TCH70	0.00402912
gi|269941861|emb|CBI50271.1|	TCH70	0.000238659
gi|269942036|emb|CBI50448.1|	TCH70	4.90216e-07
gi|269942061|emb|CBI50473.1|	TCH70	3.75775e-10
gi|269942085|emb|CBI50498.1|	TCH70	0.00962513
gi|269942102|emb|CBI50515.1|	TCH70	0.00962513
gi|269939543|emb|CBI47901.1|	M140olga	0.00962513
gi|269939861|emb|CBI48231.1|	M140olga	5.32528e-08
gi|269939886|emb|CBI48257.1|	M140olga	5.32528e-08
gi|269941416|emb|CBI49813.1|	M140olga	0.00962513
gi|269941442|emb|CBI49839.1|	M140olga	0.00962513
gi|269939548|emb|CBI47906.1|	COL	0.000636424
gi|269939596|emb|CBI47962.1|	COL	0.00163083
gi|269939839|emb|CBI48208.1|	COL	5.32528e-08
gi|269939866|emb|CBI48236.1|	COL	1.1649e-08
gi|269939901|emb|CBI48272.1|	COL	4.11358e-13
gi|269940085|emb|CBI48461.1|	COL	0.000636424
gi|269940110|emb|CBI48486.1|	COL	0.000636424
gi|269940385|emb|CBI48762.1|	COL	8.29855e-07
gi|269940423|emb|CBI48800.1|	COL	9.50562e-06
gi|269941393|emb|CBI49790.1|	COL	0.00402912
gi|269941434|emb|CBI49831.1|	COL	8.29855e-07
gi|269941463|emb|CBI49860.1|	COL	4.11358e-13
gi|269941499|emb|CBI49897.1|	COL	5.18311e-11
gi|269941647|emb|CBI50053.1|	COL	4.11358e-13
gi|269941797|emb|CBI50206.1|	COL	0.000238659
gi|269941846|emb|CBI50256.1|	COL	2.9309e-05
gi|269942122|emb|CBI50535.1|	COL	4.11358e-13
gi|269939568|emb|CBI47929.1|	E1410	0.00305107
gi|269939616|emb|CBI47982.1|	E1410	0.000238659
gi|269939731|emb|CBI48099.1|	E1410	0.00962513
gi|269939856|emb|CBI48226.1|	E1410	5.55333e-12
gi|269942122|emb|CBI50535.1|	E1410	4.11358e-13
gi|269942259|emb|CBI50674.1|	E1410	2.90449e-06
gi|269942285|emb|CBI50700.1|	E1410	0.00857851
gi|269939568|emb|CBI47929.1|	M809	0.00305107
gi|269939616|emb|CBI47982.1|	M809	0.000238659
gi|269939839|emb|CBI48208.1|	M809	4.11358e-13
gi|269939865|emb|CBI48235.1|	M809	0.000636424
gi|269939927|emb|CBI48299.1|	M809	0.000636424
gi|269942119|emb|CBI50532.1|	M809	5.55333e-12
gi|269942143|emb|CBI50556.1|	M809	0.00402912
gi|269942167|emb|CBI50581.1|	M809	0.00402912
gi|269942191|emb|CBI50605.1|	M809	0.0222898
gi|269942199|emb|CBI50613.1|	M809	0.0222898
gi|269940174|emb|CBI48550.1|	ATCC51811	1.90142e-07
gi|269940201|emb|CBI48578.1|	ATCC51811	5.32528e-08
gi|269940255|emb|CBI48632.1|	ATCC51811	0.00402912
gi|269940267|emb|CBI48644.1|	ATCC51811	0.000209758
gi|269940326|emb|CBI48703.1|	ATCC51811	0.00229194
gi|269940351|emb|CBI48728.1|	ATCC51811	4.90216e-07
gi|269940386|emb|CBI48763.1|	ATCC51811	3.75775e-10
gi|269940417|emb|CBI48794.1|	ATCC51811	0.000238659
gi|269940455|emb|CBI48832.1|	ATCC51811	0.000286753
gi|269940549|emb|CBI48928.1|	ATCC51811	0.000238659
gi|269940569|emb|CBI48948.1|	ATCC51811	5.32528e-08
gi|269940593|emb|CBI48972.1|	ATCC51811	0.00962513
gi|269940658|emb|CBI49037.1|	ATCC51811	8.0212e-07
gi|269940705|emb|CBI49086.1|	ATCC51811	2.19668e-07
gi|269940730|emb|CBI49111.1|	ATCC51811	0.010122
gi|269940769|emb|CBI49151.1|	ATCC51811	0.00962513
gi|269940819|emb|CBI49201.1|	ATCC51811	4.11358e-13
gi|269940872|emb|CBI49254.1|	ATCC51811	5.55333e-12
gi|269940901|emb|CBI49284.1|	ATCC51811	0.000636424
gi|269940927|emb|CBI49311.1|	ATCC51811	9.50562e-06
gi|269940953|emb|CBI49337.1|	ATCC51811	5.55333e-12
gi|269941035|emb|CBI49419.1|	ATCC51811	2.25465e-09
gi|269941077|emb|CBI49461.1|	ATCC51811	5.32528e-08
gi|269941134|emb|CBI49520.1|	ATCC51811	4.72777e-05
gi|269941204|emb|CBI49592.1|	ATCC51811	0.00959505
gi|269941245|emb|CBI49634.1|	ATCC51811	0.00962513
gi|269941365|emb|CBI49762.1|	ATCC51811	1.1649e-08
gi|269941442|emb|CBI49839.1|	ATCC51811	7.0946e-05
gi|269941470|emb|CBI49867.1|	ATCC51811	8.29855e-07
gi|269941679|emb|CBI50086.1|	ATCC51811	5.18311e-11
gi|269941740|emb|CBI50147.1|	ATCC51811	4.11358e-13
gi|269941800|emb|CBI50209.1|	ATCC51811	0.00402912
gi|269941851|emb|CBI50261.1|	ATCC51811	0.000636424
gi|269941879|emb|CBI50289.1|	ATCC51811	0.00962513
gi|269941935|emb|CBI50346.1|	ATCC51811	8.56724e-05
gi|269941963|emb|CBI50374.1|	ATCC51811	0.000238659
gi|269941988|emb|CBI50400.1|	ATCC51811	0.00192151
gi|269942077|emb|CBI50490.1|	ATCC51811	0.00962513
gi|269942102|emb|CBI50515.1|	ATCC51811	0.00962513
gi|269941794|emb|CBI50203.1|	D139	0.00962513
gi|269941843|emb|CBI50253.1|	D139	0.00962513
gi|269942048|emb|CBI50460.1|	D139	0.000238659
gi|269942073|emb|CBI50486.1|	D139	0.000238659
gi|269940018|emb|CBI48394.1|	A9299	5.32528e-08
gi|269940039|emb|CBI48415.1|	A9299	6.30991e-06
gi|269941504|emb|CBI49902.1|	A9299	0.000636424
gi|269941633|emb|CBI50039.1|	A9299	0.00962513
gi|269941658|emb|CBI50065.1|	A9299	0.00962513
gi|269941858|emb|CBI50268.1|	A9299	0.000238659
gi|269941985|emb|CBI50397.1|	A9299	8.29855e-07
gi|269942031|emb|CBI50443.1|	A9299	6.30991e-06
gi|269940135|emb|CBI48511.1|	MSSA476	0.000331219
gi|269940174|emb|CBI48550.1|	MSSA476	2.90449e-06
gi|269940248|emb|CBI48625.1|	MSSA476	8.56724e-05
gi|269940292|emb|CBI48669.1|	MSSA476	3.04872e-06
gi|269940350|emb|CBI48727.1|	MSSA476	2.25465e-09
gi|269940393|emb|CBI48770.1|	MSSA476	1.1649e-08
gi|269940452|emb|CBI48829.1|	MSSA476	0.00229194
gi|269940476|emb|CBI48853.1|	MSSA476	0.00543563
gi|269940493|emb|CBI48870.1|	MSSA476	2.9309e-05
gi|269940549|emb|CBI48928.1|	MSSA476	0.00192151
gi|269940569|emb|CBI48948.1|	MSSA476	2.19668e-07
gi|269940593|emb|CBI48972.1|	MSSA476	0.00163083
gi|269940627|emb|CBI49006.1|	MSSA476	8.29855e-07
gi|269940651|emb|CBI49030.1|	MSSA476	0.00402912
gi|269940682|emb|CBI49061.1|	MSSA476	0.0222898
gi|269940706|emb|CBI49087.1|	MSSA476	3.75775e-10
gi|269940734|emb|CBI49115.1|	MSSA476	0.000331219
gi|269940753|emb|CBI49135.1|	MSSA476	8.56724e-05
gi|269940817|emb|CBI49199.1|	MSSA476	0.0222898
gi|269940833|emb|CBI49215.1|	MSSA476	0.00461407
gi|269940853|emb|CBI49235.1|	MSSA476	4.38041e-05
gi|269940888|emb|CBI49271.1|	MSSA476	0.0487971
gi|269940894|emb|CBI49277.1|	MSSA476	0.0487971
gi|269940914|emb|CBI49298.1|	MSSA476	0.00962513
gi|269940954|emb|CBI49338.1|	MSSA476	3.75775e-10
gi|269940991|emb|CBI49375.1|	MSSA476	0.000762034
gi|269941034|emb|CBI49418.1|	MSSA476	0.00461407
gi|269941086|emb|CBI49471.1|	MSSA476	5.32528e-08
gi|269941111|emb|CBI49497.1|	MSSA476	0.00419941
gi|269941126|emb|CBI49512.1|	MSSA476	8.56724e-05
gi|269941150|emb|CBI49537.1|	MSSA476	0.00962513
gi|269941187|emb|CBI49575.1|	MSSA476	2.21448e-05
gi|269941215|emb|CBI49603.1|	MSSA476	7.13196e-08
gi|269941257|emb|CBI49646.1|	MSSA476	9.54565e-06
gi|269941282|emb|CBI49677.1|	MSSA476	1.61809e-06
gi|269941372|emb|CBI49769.1|	MSSA476	8.56724e-05
gi|269941408|emb|CBI49805.1|	MSSA476	0.00361372
gi|269941432|emb|CBI49829.1|	MSSA476	1.43383e-09
gi|269941455|emb|CBI49852.1|	MSSA476	0.0180769
gi|269941466|emb|CBI49863.1|	MSSA476	0.000636424
gi|269941676|emb|CBI50083.1|	MSSA476	4.11358e-13
gi|269941742|emb|CBI50149.1|	MSSA476	3.98322e-08
gi|269941861|emb|CBI50271.1|	MSSA476	0.000238659
gi|269941962|emb|CBI50373.1|	MSSA476	2.90449e-06
gi|269941987|emb|CBI50399.1|	MSSA476	0.00305107
gi|269942036|emb|CBI50448.1|	MSSA476	3.75775e-10
gi|269942060|emb|CBI50472.1|	MSSA476	0.00120859
gi|269942077|emb|CBI50490.1|	MSSA476	1.05929e-05
gi|269942119|emb|CBI50532.1|	MSSA476	8.29855e-07
gi|269939553|emb|CBI47912.1|	MRGR3	1.23819e-10
gi|269939592|emb|CBI47957.1|	MRGR3	2.25465e-09
gi|269941468|emb|CBI49865.1|	MRGR3	5.32528e-08
gi|269941647|emb|CBI50053.1|	MRGR3	4.11358e-13
gi|269939931|emb|CBI48303.1|	Mu50	4.11358e-13
gi|269940010|emb|CBI48386.1|	Mu50	4.11358e-13
gi|269940168|emb|CBI48544.1|	Mu50	0.00962513
gi|269940236|emb|CBI48613.1|	Mu50	0.00962513
gi|269940333|emb|CBI48710.1|	Mu50	0.0222898
gi|269940358|emb|CBI48735.1|	Mu50	0.0222898
gi|269940452|emb|CBI48829.1|	Mu50	0.00715037
gi|269940477|emb|CBI48854.1|	Mu50	9.50562e-06
gi|269940585|emb|CBI48964.1|	Mu50	0.00962513
gi|269940634|emb|CBI49013.1|	Mu50	0.00962513
gi|269940659|emb|CBI49038.1|	Mu50	0.00163083
gi|269940701|emb|CBI49082.1|	Mu50	0.000636424
gi|269940770|emb|CBI49152.1|	Mu50	9.50562e-06
gi|269940819|emb|CBI49201.1|	Mu50	0.00962513
gi|269941421|emb|CBI49818.1|	Mu50	0.00543563
gi|269941446|emb|CBI49843.1|	Mu50	2.9309e-05
gi|269941646|emb|CBI50052.1|	Mu50	0.00402912
gi|269941654|emb|CBI50060.1|	Mu50	0.012116
gi|269941679|emb|CBI50086.1|	Mu50	8.56724e-05
gi|269941797|emb|CBI50206.1|	Mu50	4.11358e-13
gi|269941855|emb|CBI50265.1|	Mu50	5.32528e-08
gi|269939560|emb|CBI47921.1|	JH9	2.90449e-06
gi|269939614|emb|CBI47980.1|	JH9	2.19668e-07
gi|269939839|emb|CBI48208.1|	JH9	4.11358e-13
gi|269939896|emb|CBI48267.1|	JH9	4.11358e-13
gi|269940012|emb|CBI48388.1|	JH9	0.00962513
gi|269940033|emb|CBI48409.1|	JH9	0.00962513
gi|269940333|emb|CBI48710.1|	JH9	0.0222898
gi|269940358|emb|CBI48735.1|	JH9	0.0222898
gi|269940382|emb|CBI48759.1|	JH9	0.0222898
gi|269940654|emb|CBI49033.1|	JH9	0.000238659
gi|269940696|emb|CBI49077.1|	JH9	0.00163083
gi|269940769|emb|CBI49151.1|	JH9	1.90142e-07
gi|269940820|emb|CBI49202.1|	JH9	5.32528e-08
gi|269941064|emb|CBI49448.1|	JH9	0.00163083
gi|269941089|emb|CBI49475.1|	JH9	0.0105805
gi|269941113|emb|CBI49499.1|	JH9	0.00192151
gi|269941137|emb|CBI49524.1|	JH9	0.000238659
gi|269941443|emb|CBI49840.1|	JH9	0.00829863
gi|269941468|emb|CBI49865.1|	JH9	0.000238659
gi|269941492|emb|CBI49890.1|	JH9	0.000636424
gi|269941504|emb|CBI49902.1|	JH9	0.000636424
gi|269941977|emb|CBI50389.1|	JH9	0.00163083
gi|269942040|emb|CBI50452.1|	JH9	0.000286753
gi|269939685|emb|CBI48053.1|	C160	5.32528e-08
gi|269939736|emb|CBI48104.1|	C160	6.30991e-06
gi|269939766|emb|CBI48134.1|	C160	0.0222413
gi|269939805|emb|CBI48173.1|	C160	0.000209758
gi|269939839|emb|CBI48208.1|	C160	0.00962513
gi|269939847|emb|CBI48217.1|	C160	0.00962513
gi|269939874|emb|CBI48245.1|	C160	0.000636424
gi|269939900|emb|CBI48271.1|	C160	0.000636424
gi|269941794|emb|CBI50203.1|	C160	0.00962513
gi|269941843|emb|CBI50253.1|	C160	0.00962513
gi|269942121|emb|CBI50534.1|	C160	8.56724e-05
gi|269942146|emb|CBI50559.1|	C160	0.012116
gi|269942170|emb|CBI50584.1|	C160	0.0254766
gi|269942183|emb|CBI50597.1|	C160	0.0377584
gi|269939587|emb|CBI47952.1|	58424	0.0487971
gi|269939616|emb|CBI47982.1|	58424	0.0222898
gi|269939839|emb|CBI48208.1|	58424	4.11358e-13
gi|269939875|emb|CBI48246.1|	58424	0.000636424
gi|269939900|emb|CBI48271.1|	58424	0.000636424
gi|269942119|emb|CBI50532.1|	58424	5.55333e-12
gi|269939895|emb|CBI48266.1|	USA300	4.11358e-13
gi|269940372|emb|CBI48749.1|	USA300	0.0222898
gi|269940415|emb|CBI48792.1|	USA300	0.0222898
gi|269941419|emb|CBI49816.1|	USA300	4.11358e-13
gi|269941469|emb|CBI49866.1|	USA300	3.75775e-10
gi|269941503|emb|CBI49901.1|	USA300	4.11358e-13
gi|269941647|emb|CBI50053.1|	USA300	4.11358e-13
gi|269942124|emb|CBI50537.1|	USA300	4.11358e-13
gi|269939891|emb|CBI48262.1|	A9754	5.18311e-11
gi|269941419|emb|CBI49816.1|	A9754	4.11358e-13
gi|269941463|emb|CBI49860.1|	A9754	4.11358e-13
gi|269941494|emb|CBI49892.1|	A9754	2.90449e-06
gi|269941544|emb|CBI49949.1|	A9754	0.00163083
gi|269941647|emb|CBI50053.1|	A9754	4.11358e-13
gi|269942122|emb|CBI50535.1|	A9754	4.11358e-13
gi|269939554|emb|CBI47913.1|	A017934	3.40241e-05
gi|269939616|emb|CBI47982.1|	A017934	0.00361372
gi|269939631|emb|CBI47999.1|	A017934	0.0374297
gi|269939722|emb|CBI48090.1|	A017934	2.19668e-07
gi|269939815|emb|CBI48183.1|	A017934	1.90142e-07
gi|269939839|emb|CBI48208.1|	A017934	1.90142e-07
gi|269939858|emb|CBI48228.1|	A017934	1.90142e-07
gi|269939882|emb|CBI48253.1|	A017934	0.00192151
gi|269939900|emb|CBI48271.1|	A017934	0.000238659
gi|269941794|emb|CBI50203.1|	A017934	0.00962513
gi|269941843|emb|CBI50253.1|	A017934	0.00962513
gi|269942122|emb|CBI50535.1|	A017934	4.11358e-13
gi|269942147|emb|CBI50560.1|	A017934	0.000636424
gi|269942216|emb|CBI50630.1|	A017934	0.00857851
gi|269942251|emb|CBI50665.1|	A017934	5.32528e-08
gi|269939614|emb|CBI47980.1|	A5948	0.00402912
gi|269939853|emb|CBI48223.1|	A5948	0.0222898
gi|269939896|emb|CBI48267.1|	A5948	5.32528e-08
gi|269940385|emb|CBI48762.1|	A5948	2.90449e-06
gi|269940415|emb|CBI48792.1|	A5948	8.29855e-07
gi|269941419|emb|CBI49816.1|	A5948	2.9309e-05
gi|269941446|emb|CBI49843.1|	A5948	0.0377584
gi|269941468|emb|CBI49865.1|	A5948	0.00962513
gi|269941503|emb|CBI49901.1|	A5948	4.11358e-13
gi|269941647|emb|CBI50053.1|	A5948	4.11358e-13
gi|269942121|emb|CBI50534.1|	A5948	4.11358e-13
gi|269939551|emb|CBI47909.1|	MN8	5.55333e-12
gi|269939592|emb|CBI47957.1|	MN8	0.00962513
gi|269939616|emb|CBI47982.1|	MN8	0.00962513
gi|269939668|emb|CBI48036.1|	MN8	2.90449e-06
gi|269939727|emb|CBI48095.1|	MN8	8.56724e-05
gi|269939766|emb|CBI48134.1|	MN8	2.25465e-09
gi|269939815|emb|CBI48183.1|	MN8	1.1649e-08
gi|269941421|emb|CBI49818.1|	MN8	0.000636424
gi|269941456|emb|CBI49853.1|	MN8	0.00192151
gi|269941794|emb|CBI50203.1|	MN8	0.00962513
gi|269941843|emb|CBI50253.1|	MN8	0.00962513
gi|269942121|emb|CBI50534.1|	MN8	5.55333e-12
gi|269942162|emb|CBI50576.1|	MN8	5.55333e-12
gi|269942186|emb|CBI50600.1|	MN8	0.00163083
gi|269942217|emb|CBI50631.1|	MN8	2.90449e-06
gi|269942241|emb|CBI50655.1|	MN8	0.00163083
gi|269942251|emb|CBI50665.1|	MN8	0.00163083
gi|269940954|emb|CBI49338.1|	ED133	0.0222898
gi|269940979|emb|CBI49363.1|	ED133	0.0222898
gi|269939559|emb|CBI47919.1|	ATCCBAA39	0.00962513
gi|269939576|emb|CBI47939.1|	ATCCBAA39	0.0156526
gi|269939600|emb|CBI47966.1|	ATCCBAA39	2.9309e-05
gi|269941442|emb|CBI49839.1|	ATCCBAA39	0.00962513
gi|269941467|emb|CBI49864.1|	ATCCBAA39	0.00962513
gi|269941491|emb|CBI49889.1|	ATCCBAA39	0.000238659
gi|269941542|emb|CBI49943.1|	ATCCBAA39	2.9309e-05
gi|269941647|emb|CBI50053.1|	ATCCBAA39	4.11358e-13
gi|269940386|emb|CBI48763.1|	JKD6159	0.00163083
gi|269940415|emb|CBI48792.1|	JKD6159	0.00163083
gi|269941794|emb|CBI50203.1|	JKD6159	0.00962513
gi|269941843|emb|CBI50253.1|	JKD6159	0.00962513
gi|269939532|emb|CBI47890.1|	NCTC	0.00962513
gi|269939581|emb|CBI47944.1|	NCTC	0.00962513
gi|269939899|emb|CBI48270.1|	NCTC	4.11358e-13
gi|269941419|emb|CBI49816.1|	NCTC	4.11358e-13
gi|269941453|emb|CBI49850.1|	NCTC	5.18311e-11
gi|269941503|emb|CBI49901.1|	NCTC	4.11358e-13
gi|269941647|emb|CBI50053.1|	NCTC	4.11358e-13
gi|269941846|emb|CBI50256.1|	NCTC	0.0222898
gi|269942122|emb|CBI50535.1|	NCTC	4.11358e-13
gi|269939839|emb|CBI48208.1|	USA300TCH959	5.32528e-08
gi|269939867|emb|CBI48237.1|	USA300TCH959	1.1649e-08
gi|269939905|emb|CBI48276.1|	USA300TCH959	0.00962513
gi|269939930|emb|CBI48302.1|	USA300TCH959	0.00962513
gi|269939954|emb|CBI48327.1|	USA300TCH959	0.00402912
gi|269939994|emb|CBI48370.1|	USA300TCH959	0.00402912
gi|269940174|emb|CBI48550.1|	USA300TCH959	0.0222898
gi|269940258|emb|CBI48635.1|	USA300TCH959	0.000209758
gi|269940283|emb|CBI48660.1|	USA300TCH959	3.40241e-05
gi|269940333|emb|CBI48710.1|	USA300TCH959	0.0374297
gi|269940346|emb|CBI48723.1|	USA300TCH959	0.00543563
gi|269940364|emb|CBI48741.1|	USA300TCH959	3.04872e-06
gi|269940424|emb|CBI48801.1|	USA300TCH959	5.18311e-11
gi|269940481|emb|CBI48858.1|	USA300TCH959	2.9309e-05
gi|269940528|emb|CBI48907.1|	USA300TCH959	0.000577202
gi|269940552|emb|CBI48931.1|	USA300TCH959	0.00148816
gi|269940566|emb|CBI48945.1|	USA300TCH959	2.9309e-05
gi|269940660|emb|CBI49039.1|	USA300TCH959	3.75775e-10
gi|269940700|emb|CBI49081.1|	USA300TCH959	7.13196e-08
gi|269940735|emb|CBI49116.1|	USA300TCH959	0.00163083
gi|269940768|emb|CBI49150.1|	USA300TCH959	0.00402912
gi|269940872|emb|CBI49254.1|	USA300TCH959	5.55333e-12
gi|269940931|emb|CBI49315.1|	USA300TCH959	2.19668e-07
gi|269940962|emb|CBI49346.1|	USA300TCH959	2.19668e-07
gi|269940991|emb|CBI49375.1|	USA300TCH959	0.000238659
gi|269941029|emb|CBI49413.1|	USA300TCH959	2.9309e-05
gi|269941060|emb|CBI49444.1|	USA300TCH959	0.00402912
gi|269941109|emb|CBI49495.1|	USA300TCH959	0.00163083
gi|269941138|emb|CBI49525.1|	USA300TCH959	2.19668e-07
gi|269941187|emb|CBI49575.1|	USA300TCH959	8.29855e-07
gi|269941404|emb|CBI49801.1|	USA300TCH959	0.00402912
gi|269941477|emb|CBI49874.1|	USA300TCH959	0.00402912
gi|269941647|emb|CBI50053.1|	USA300TCH959	2.25465e-09
gi|269941673|emb|CBI50080.1|	USA300TCH959	2.25465e-09
gi|269941748|emb|CBI50156.1|	USA300TCH959	1.1649e-08
gi|269941783|emb|CBI50192.1|	USA300TCH959	0.00051657
gi|269941846|emb|CBI50256.1|	USA300TCH959	9.50562e-06
gi|269941935|emb|CBI50346.1|	USA300TCH959	0.00962513
gi|269941985|emb|CBI50397.1|	USA300TCH959	8.29855e-07
gi|269942025|emb|CBI50437.1|	USA300TCH959	0.0180769
gi|269942074|emb|CBI50487.1|	USA300TCH959	3.75775e-10
gi|269942121|emb|CBI50534.1|	USA300TCH959	5.55333e-12
gi|269939560|emb|CBI47921.1|	JH1	2.90449e-06
gi|269939614|emb|CBI47980.1|	JH1	2.19668e-07
gi|269939839|emb|CBI48208.1|	JH1	4.11358e-13
gi|269939893|emb|CBI48264.1|	JH1	4.11358e-13
gi|269940333|emb|CBI48710.1|	JH1	0.0222898
gi|269940358|emb|CBI48735.1|	JH1	0.0222898
gi|269940382|emb|CBI48759.1|	JH1	0.0222898
gi|269940654|emb|CBI49033.1|	JH1	8.56724e-05
gi|269940696|emb|CBI49077.1|	JH1	0.00163083
gi|269941064|emb|CBI49448.1|	JH1	0.00163083
gi|269941089|emb|CBI49475.1|	JH1	0.0105805
gi|269941113|emb|CBI49499.1|	JH1	0.00192151
gi|269941137|emb|CBI49524.1|	JH1	0.000238659
gi|269941371|emb|CBI49768.1|	JH1	0.00402912
gi|269941420|emb|CBI49817.1|	JH1	0.000238659
gi|269941492|emb|CBI49890.1|	JH1	0.000636424
gi|269941504|emb|CBI49902.1|	JH1	0.000636424
gi|269941797|emb|CBI50206.1|	JH1	0.000238659
gi|269941858|emb|CBI50268.1|	JH1	3.04872e-06
gi|269941977|emb|CBI50389.1|	JH1	0.00163083
gi|269942040|emb|CBI50452.1|	JH1	0.000286753
gi|269939559|emb|CBI47919.1|	651322	9.50562e-06
gi|269939616|emb|CBI47982.1|	651322	2.25465e-09
gi|269939839|emb|CBI48208.1|	651322	4.11358e-13
gi|269942122|emb|CBI50535.1|	651322	2.90449e-06
gi|269942143|emb|CBI50556.1|	651322	0.000286753
gi|269942216|emb|CBI50630.1|	651322	5.55333e-12
gi|269942244|emb|CBI50658.1|	651322	1.14773e-08
gi|269942269|emb|CBI50684.1|	651322	4.90216e-07
gi|269939616|emb|CBI47982.1|	M899	0.00962513
gi|269939839|emb|CBI48208.1|	M899	4.11358e-13
gi|269939875|emb|CBI48246.1|	M899	0.000636424
gi|269939900|emb|CBI48271.1|	M899	0.000636424
gi|269942122|emb|CBI50535.1|	M899	4.11358e-13
gi|269942250|emb|CBI50664.1|	M899	0.000636424
gi|269942275|emb|CBI50690.1|	M899	0.000636424
gi|269939560|emb|CBI47921.1|	A9781	2.90449e-06
gi|269939614|emb|CBI47980.1|	A9781	2.19668e-07
gi|269939839|emb|CBI48208.1|	A9781	5.55333e-12
gi|269939880|emb|CBI48251.1|	A9781	4.11358e-13
gi|269940417|emb|CBI48794.1|	A9781	0.0487971
gi|269940472|emb|CBI48849.1|	A9781	0.00402912
gi|269941061|emb|CBI49445.1|	A9781	0.0222898
gi|269941113|emb|CBI49499.1|	A9781	0.000286753
gi|269941141|emb|CBI49528.1|	A9781	2.9309e-05
gi|269941488|emb|CBI49886.1|	A9781	8.56724e-05
gi|269941504|emb|CBI49902.1|	A9781	8.56724e-05
gi|269941797|emb|CBI50206.1|	A9781	0.000238659
gi|269941858|emb|CBI50268.1|	A9781	2.19668e-07
gi|269941985|emb|CBI50397.1|	A9781	8.29855e-07
gi|269942031|emb|CBI50443.1|	A9781	6.30991e-06
gi|269939543|emb|CBI47901.1|	ST398	0.00402912
gi|269939590|emb|CBI47955.1|	ST398	0.0374297
gi|269941794|emb|CBI50203.1|	ST398	0.00962513
gi|269941843|emb|CBI50253.1|	ST398	0.00962513
gi|269939931|emb|CBI48303.1|	Mu3	4.11358e-13
gi|269940006|emb|CBI48382.1|	Mu3	4.11358e-13
gi|269940097|emb|CBI48473.1|	Mu3	0.00402912
gi|269940168|emb|CBI48544.1|	Mu3	0.00962513
gi|269940216|emb|CBI48593.1|	Mu3	0.032157
gi|269940241|emb|CBI48618.1|	Mu3	8.56724e-05
gi|269940333|emb|CBI48710.1|	Mu3	0.0222898
gi|269940358|emb|CBI48735.1|	Mu3	0.0222898
gi|269940452|emb|CBI48829.1|	Mu3	0.00715037
gi|269940477|emb|CBI48854.1|	Mu3	9.50562e-06
gi|269940585|emb|CBI48964.1|	Mu3	0.00962513
gi|269940634|emb|CBI49013.1|	Mu3	0.00962513
gi|269940659|emb|CBI49038.1|	Mu3	0.00163083
gi|269940701|emb|CBI49082.1|	Mu3	0.000636424
gi|269940770|emb|CBI49152.1|	Mu3	9.50562e-06
gi|269940819|emb|CBI49201.1|	Mu3	0.00962513
gi|269941421|emb|CBI49818.1|	Mu3	2.9309e-05
gi|269941446|emb|CBI49843.1|	Mu3	2.9309e-05
gi|269941646|emb|CBI50052.1|	Mu3	0.00402912
gi|269941654|emb|CBI50060.1|	Mu3	0.012116
gi|269941679|emb|CBI50086.1|	Mu3	8.56724e-05
gi|269941797|emb|CBI50206.1|	Mu3	4.11358e-13
gi|269941855|emb|CBI50265.1|	Mu3	5.32528e-08
gi|269939841|emb|CBI48211.1|	N315	2.9309e-05
gi|269939866|emb|CBI48236.1|	N315	2.9309e-05
gi|269939920|emb|CBI48291.1|	N315	2.9309e-05
gi|269939945|emb|CBI48317.1|	N315	2.9309e-05
gi|269940118|emb|CBI48494.1|	N315	0.0222898
gi|269940168|emb|CBI48544.1|	N315	0.00962513
gi|269940203|emb|CBI48580.1|	N315	4.11358e-13
gi|269940252|emb|CBI48629.1|	N315	4.11358e-13
gi|269940333|emb|CBI48710.1|	N315	0.0222898
gi|269940358|emb|CBI48735.1|	N315	0.0222898
gi|269940461|emb|CBI48838.1|	N315	0.00305107
gi|269940477|emb|CBI48854.1|	N315	0.000577202
gi|269940585|emb|CBI48964.1|	N315	0.00962513
gi|269940634|emb|CBI49013.1|	N315	0.00962513
gi|269940659|emb|CBI49038.1|	N315	0.00163083
gi|269940681|emb|CBI49060.1|	N315	0.0450045
gi|269940708|emb|CBI49089.1|	N315	0.00305107
gi|269940770|emb|CBI49152.1|	N315	9.50562e-06
gi|269940820|emb|CBI49202.1|	N315	0.000238659
gi|269941064|emb|CBI49448.1|	N315	0.00163083
gi|269941089|emb|CBI49475.1|	N315	0.0105805
gi|269941116|emb|CBI49502.1|	N315	0.000286753
gi|269941141|emb|CBI49528.1|	N315	2.9309e-05
gi|269941420|emb|CBI49817.1|	N315	0.0222898
gi|269941459|emb|CBI49856.1|	N315	0.00962513
gi|269941483|emb|CBI49881.1|	N315	8.56724e-05
gi|269941504|emb|CBI49902.1|	N315	8.56724e-05
gi|269941646|emb|CBI50052.1|	N315	0.00402912
gi|269941654|emb|CBI50060.1|	N315	0.012116
gi|269941679|emb|CBI50086.1|	N315	8.56724e-05
gi|269941797|emb|CBI50206.1|	N315	1.23819e-10
gi|269941858|emb|CBI50268.1|	N315	5.32528e-08
gi|269939549|emb|CBI47907.1|	A8115	9.50562e-06
gi|269939597|emb|CBI47963.1|	A8115	9.50562e-06
gi|269940017|emb|CBI48393.1|	A8115	0.000238659
gi|269940107|emb|CBI48483.1|	A8115	0.0186284
gi|269940333|emb|CBI48710.1|	A8115	0.0222898
gi|269940358|emb|CBI48735.1|	A8115	0.0222898
gi|269940514|emb|CBI48892.1|	A8115	0.0222898
gi|269940585|emb|CBI48964.1|	A8115	0.0222898
gi|269940652|emb|CBI49031.1|	A8115	0.000238659
gi|269941061|emb|CBI49445.1|	A8115	0.0222898
gi|269941493|emb|CBI49891.1|	A8115	0.000636424
gi|269941504|emb|CBI49902.1|	A8115	0.000636424
gi|269941646|emb|CBI50052.1|	A8115	2.90449e-06
gi|269941679|emb|CBI50086.1|	A8115	2.19668e-07
gi|269941724|emb|CBI50131.1|	A8115	0.0222898
gi|269941749|emb|CBI50157.1|	A8115	0.0222898
gi|269941977|emb|CBI50389.1|	A8115	8.56724e-05
gi|269942031|emb|CBI50443.1|	A8115	0.000209758
gi|269939664|emb|CBI48032.1|	C427	5.18311e-11
gi|269939770|emb|CBI48138.1|	C427	2.25465e-09
gi|269939814|emb|CBI48182.1|	C427	2.19668e-07
gi|269939840|emb|CBI48210.1|	C427	2.19668e-07
gi|269941794|emb|CBI50203.1|	C427	0.00962513
gi|269941843|emb|CBI50253.1|	C427	0.00962513
gi|269942142|emb|CBI50555.1|	C427	0.0180769
gi|269942151|emb|CBI50564.1|	C427	0.00857851
gi|269942199|emb|CBI50613.1|	C427	2.9309e-05
gi|269939560|emb|CBI47921.1|	A9763	2.90449e-06
gi|269939614|emb|CBI47980.1|	A9763	2.19668e-07
gi|269939839|emb|CBI48208.1|	A9763	5.55333e-12
gi|269939880|emb|CBI48251.1|	A9763	4.11358e-13
gi|269939999|emb|CBI48375.1|	A9763	0.0222898
gi|270119427|emb|CBI67632.1|	A9763	0.0222898
gi|269941061|emb|CBI49445.1|	A9763	0.0222898
gi|269941116|emb|CBI49502.1|	A9763	0.000286753
gi|269941141|emb|CBI49528.1|	A9763	2.9309e-05
gi|269941419|emb|CBI49816.1|	A9763	3.75775e-10
gi|269941466|emb|CBI49863.1|	A9763	0.00163083
gi|269941476|emb|CBI49873.1|	A9763	0.00163083
gi|269941503|emb|CBI49901.1|	A9763	4.11358e-13
gi|269941797|emb|CBI50206.1|	A9763	4.11358e-13
gi|269941858|emb|CBI50268.1|	A9763	5.32528e-08
gi|269941985|emb|CBI50397.1|	A9763	8.29855e-07
gi|269942031|emb|CBI50443.1|	A9763	6.30991e-06
gi|269939931|emb|CBI48303.1|	Mu50omega	4.11358e-13
gi|269940012|emb|CBI48388.1|	Mu50omega	4.11358e-13
gi|269940087|emb|CBI48463.1|	Mu50omega	0.0222898
gi|269940101|emb|CBI48477.1|	Mu50omega	0.00305107
gi|269940126|emb|CBI48502.1|	Mu50omega	0.0208617
gi|269940168|emb|CBI48544.1|	Mu50omega	0.00962513
gi|269940333|emb|CBI48710.1|	Mu50omega	0.0222898
gi|269940358|emb|CBI48735.1|	Mu50omega	0.0222898
gi|269940417|emb|CBI48794.1|	Mu50omega	0.00962513
gi|269940455|emb|CBI48832.1|	Mu50omega	0.000146579
gi|269940480|emb|CBI48857.1|	Mu50omega	3.75775e-10
gi|269940585|emb|CBI48964.1|	Mu50omega	0.00962513
gi|269940634|emb|CBI49013.1|	Mu50omega	0.00962513
gi|269940659|emb|CBI49038.1|	Mu50omega	8.56724e-05
gi|269940701|emb|CBI49082.1|	Mu50omega	8.56724e-05
gi|269940764|emb|CBI49146.1|	Mu50omega	8.29855e-07
gi|269940784|emb|CBI49166.1|	Mu50omega	0.0420781
gi|269940789|emb|CBI49171.1|	Mu50omega	0.0222413
gi|269940813|emb|CBI49195.1|	Mu50omega	0.00962513
gi|269941430|emb|CBI49827.1|	Mu50omega	0.00543563
gi|269941446|emb|CBI49843.1|	Mu50omega	2.9309e-05
gi|269941646|emb|CBI50052.1|	Mu50omega	0.00402912
gi|269941654|emb|CBI50060.1|	Mu50omega	0.012116
gi|269941679|emb|CBI50086.1|	Mu50omega	8.56724e-05
gi|269941797|emb|CBI50206.1|	Mu50omega	1.23819e-10
gi|269941855|emb|CBI50265.1|	Mu50omega	5.32528e-08
gi|269941794|emb|CBI50203.1|	A9635	0.00962513
gi|269941843|emb|CBI50253.1|	A9635	0.00962513
gi|269939543|emb|CBI47901.1|	WW2703	0.0208617
gi|269939567|emb|CBI47928.1|	WW2703	0.0208617
gi|269939608|emb|CBI47974.1|	WW2703	0.000543508
gi|269939633|emb|CBI48001.1|	WW2703	0.00959505
gi|269939656|emb|CBI48024.1|	WW2703	0.000636424
gi|269939747|emb|CBI48115.1|	WW2703	0.000286753
gi|269939767|emb|CBI48135.1|	WW2703	0.000331219
gi|269939814|emb|CBI48182.1|	WW2703	0.00120859
gi|269939839|emb|CBI48208.1|	WW2703	0.000111876
gi|269939862|emb|CBI48232.1|	WW2703	2.33336e-06
gi|269939900|emb|CBI48271.1|	WW2703	0.000636424
gi|269941794|emb|CBI50203.1|	WW2703	0.00962513
gi|269941843|emb|CBI50253.1|	WW2703	0.00962513
gi|269942121|emb|CBI50534.1|	WW2703	5.55333e-12
gi|269939543|emb|CBI47901.1|	MRSA252	0.0222898
gi|269939609|emb|CBI47975.1|	MRSA252	2.19668e-07
gi|269939664|emb|CBI48032.1|	MRSA252	5.32528e-08
gi|269939700|emb|CBI48068.1|	MRSA252	0.0374297
gi|269939733|emb|CBI48101.1|	MRSA252	0.00163083
gi|269939866|emb|CBI48236.1|	MRSA252	2.9309e-05
gi|269939916|emb|CBI48287.1|	MRSA252	9.50562e-06
gi|269941423|emb|CBI49820.1|	MRSA252	0.0222898
gi|269941454|emb|CBI49851.1|	MRSA252	0.00962513
gi|269941794|emb|CBI50203.1|	MRSA252	0.00962513
gi|269941843|emb|CBI50253.1|	MRSA252	0.00962513
gi|269942121|emb|CBI50534.1|	MRSA252	1.1649e-08
gi|269942151|emb|CBI50564.1|	MRSA252	0.0377584
gi|269942217|emb|CBI50631.1|	MRSA252	9.50562e-06
gi|269942241|emb|CBI50655.1|	MRSA252	0.000636424
gi|269939532|emb|CBI47890.1|	Newman	0.00962513
gi|269939581|emb|CBI47944.1|	Newman	0.00962513
gi|269939837|emb|CBI48206.1|	Newman	0.00402912
gi|269939862|emb|CBI48232.1|	Newman	0.00402912
gi|269939899|emb|CBI48270.1|	Newman	4.11358e-13
gi|269940100|emb|CBI48476.1|	Newman	2.25465e-09
gi|269940134|emb|CBI48510.1|	Newman	4.11358e-13
gi|269941419|emb|CBI49816.1|	Newman	1.1649e-08
gi|269941452|emb|CBI49849.1|	Newman	5.32528e-08
gi|269941503|emb|CBI49901.1|	Newman	4.11358e-13
gi|269941647|emb|CBI50053.1|	Newman	4.11358e-13
gi|269942122|emb|CBI50535.1|	Newman	4.11358e-13
gi|269939549|emb|CBI47907.1|	TCH60	1.1649e-08
gi|269939624|emb|CBI47992.1|	TCH60	2.90449e-06
gi|269939730|emb|CBI48098.1|	TCH60	0.00163083
gi|269939747|emb|CBI48115.1|	TCH60	0.00361372
gi|269939772|emb|CBI48140.1|	TCH60	0.032157
gi|269939839|emb|CBI48208.1|	TCH60	4.11358e-13
gi|269939876|emb|CBI48247.1|	TCH60	8.56724e-05
gi|269939901|emb|CBI48272.1|	TCH60	8.56724e-05
gi|269941794|emb|CBI50203.1|	TCH60	0.00962513
gi|269941843|emb|CBI50253.1|	TCH60	0.00962513
gi|269942161|emb|CBI50575.1|	TCH60	1.05929e-05
gi|269942217|emb|CBI50631.1|	TCH60	2.90449e-06
gi|269939891|emb|CBI48262.1|	USA300TCH1516	5.18311e-11
gi|269941419|emb|CBI49816.1|	USA300TCH1516	4.11358e-13
gi|269941463|emb|CBI49860.1|	USA300TCH1516	4.11358e-13
gi|269941503|emb|CBI49901.1|	USA300TCH1516	4.11358e-13
gi|269941649|emb|CBI50055.1|	USA300TCH1516	4.11358e-13
gi|269941795|emb|CBI50204.1|	USA300TCH1516	0.00402912
gi|269941844|emb|CBI50254.1|	USA300TCH1516	0.00402912
gi|269942122|emb|CBI50535.1|	USA300TCH1516	4.11358e-13
gi|269939543|emb|CBI47901.1|	EMRSA16	0.0180769
gi|269939609|emb|CBI47975.1|	EMRSA16	2.19668e-07
gi|269939671|emb|CBI48039.1|	EMRSA16	2.25465e-09
gi|269939751|emb|CBI48119.1|	EMRSA16	0.00163083
gi|269939799|emb|CBI48167.1|	EMRSA16	0.00402912
gi|269939866|emb|CBI48236.1|	EMRSA16	2.9309e-05
gi|269939916|emb|CBI48287.1|	EMRSA16	9.50562e-06
gi|269941422|emb|CBI49819.1|	EMRSA16	0.000636424
gi|269941457|emb|CBI49854.1|	EMRSA16	0.000238659
gi|269941794|emb|CBI50203.1|	EMRSA16	0.00962513
gi|269941843|emb|CBI50253.1|	EMRSA16	0.00962513
gi|269942121|emb|CBI50534.1|	EMRSA16	4.11358e-13
gi|269942161|emb|CBI50575.1|	EMRSA16	2.90449e-06
gi|269942208|emb|CBI50622.1|	EMRSA16	0.0222898
gi|269939609|emb|CBI47975.1|	EMRSA15	0.000238659
gi|269940382|emb|CBI48759.1|	EMRSA15	0.000636424
gi|269940415|emb|CBI48792.1|	EMRSA15	0.000636424
gi|269939839|emb|CBI48208.1|	A10102	2.25465e-09
gi|269939867|emb|CBI48237.1|	A10102	3.75775e-10
gi|269940017|emb|CBI48393.1|	A10102	2.25465e-09
gi|269940032|emb|CBI48408.1|	A10102	0.000636424
gi|269940101|emb|CBI48477.1|	A10102	4.11358e-13
gi|269940333|emb|CBI48710.1|	A10102	0.0222898
gi|269940358|emb|CBI48735.1|	A10102	0.0222898
gi|269941116|emb|CBI49502.1|	A10102	2.9309e-05
gi|269941141|emb|CBI49528.1|	A10102	2.9309e-05
gi|269941418|emb|CBI49815.1|	A10102	0.00962513
gi|269941443|emb|CBI49840.1|	A10102	0.00962513
gi|269941479|emb|CBI49876.1|	A10102	0.000636424
gi|269941504|emb|CBI49902.1|	A10102	0.000636424
gi|269941797|emb|CBI50206.1|	A10102	0.000238659
gi|269941858|emb|CBI50268.1|	A10102	2.19668e-07
gi|269941985|emb|CBI50397.1|	A10102	8.29855e-07
gi|269942031|emb|CBI50443.1|	A10102	6.30991e-06
gi|269939568|emb|CBI47929.1|	M876	0.00305107
gi|269939616|emb|CBI47982.1|	M876	0.000238659
gi|269939839|emb|CBI48208.1|	M876	4.11358e-13
gi|269939875|emb|CBI48246.1|	M876	0.000636424
gi|269939900|emb|CBI48271.1|	M876	0.000636424
gi|269942118|emb|CBI50531.1|	M876	4.11358e-13
gi|269942246|emb|CBI50660.1|	M876	4.11358e-13
gi|269942277|emb|CBI50692.1|	M876	4.11358e-13
gi|269939568|emb|CBI47929.1|	552053	0.00305107
gi|269939616|emb|CBI47982.1|	552053	0.000238659
gi|269939766|emb|CBI48134.1|	552053	0.0222898
gi|269939815|emb|CBI48183.1|	552053	0.0222898
gi|269939839|emb|CBI48208.1|	552053	4.11358e-13
gi|269939866|emb|CBI48236.1|	552053	0.00402912
gi|269939891|emb|CBI48262.1|	552053	0.00402912
gi|269942122|emb|CBI50535.1|	552053	4.11358e-13
gi|269939840|emb|CBI48210.1|	930918	2.9309e-05
gi|269939865|emb|CBI48235.1|	930918	2.9309e-05
gi|269939893|emb|CBI48264.1|	930918	5.55333e-12
gi|269941408|emb|CBI49805.1|	930918	5.18311e-11
gi|269941462|emb|CBI49859.1|	930918	1.1649e-08
gi|269941503|emb|CBI49901.1|	930918	4.11358e-13
gi|269941647|emb|CBI50053.1|	930918	4.11358e-13
gi|269942122|emb|CBI50535.1|	930918	4.11358e-13
gi|269941429|emb|CBI49826.1|	H19	1.1649e-08
gi|269941454|emb|CBI49851.1|	H19	9.54565e-06
gi|269941475|emb|CBI49872.1|	H19	0.0222898
gi|269939543|emb|CBI47901.1|	CFMarseille	0.00163083
gi|269939593|emb|CBI47958.1|	CFMarseille	0.000636424
gi|269939921|emb|CBI48292.1|	CFMarseille	0.00402912
gi|269939938|emb|CBI48310.1|	CFMarseille	0.00402912
gi|269940008|emb|CBI48384.1|	CFMarseille	8.56724e-05
gi|269940029|emb|CBI48405.1|	CFMarseille	8.56724e-05
gi|269940087|emb|CBI48463.1|	CFMarseille	8.29855e-07
gi|269940135|emb|CBI48511.1|	CFMarseille	8.29855e-07
gi|269940417|emb|CBI48794.1|	CFMarseille	0.0487971
gi|269940462|emb|CBI48839.1|	CFMarseille	0.00962513
gi|269940681|emb|CBI49060.1|	CFMarseille	0.00163083
gi|269940708|emb|CBI49089.1|	CFMarseille	0.0374297
gi|269940727|emb|CBI49108.1|	CFMarseille	0.00962513
gi|269941458|emb|CBI49855.1|	CFMarseille	0.00163083
gi|269941739|emb|CBI50146.1|	CFMarseille	1.1649e-08
gi|269941795|emb|CBI50204.1|	CFMarseille	7.0946e-05
gi|269941858|emb|CBI50268.1|	CFMarseille	0.00402912
gi|269939860|emb|CBI48230.1|	D30	0.0105805
gi|269939902|emb|CBI48273.1|	D30	2.19668e-07
gi|269940390|emb|CBI48767.1|	D30	0.00163083
gi|269940415|emb|CBI48792.1|	D30	0.00163083
gi|269941406|emb|CBI49803.1|	D30	4.11358e-13
gi|269941477|emb|CBI49874.1|	D30	4.11358e-13
gi|269941503|emb|CBI49901.1|	D30	4.11358e-13
gi|269941647|emb|CBI50053.1|	D30	4.11358e-13
gi|269942122|emb|CBI50535.1|	D30	4.11358e-13
