# Supplementary material for: A Novel Computational Method Identifies Intra- and Inter-Species Recombination Events in Staphylococcus aureus and Streptococcus pneumoniae
Source: PLoS Comput Biol. 2012 Sep 6;8(9):e1002668. doi: 10.1371/journal.pcbi.1002668 (PMC3435249; doi:10.1371/journal.pcbi.1002668)
Supplement: Table S6 — Inter species recombination. We report the id, functional annotation and conservation of the genes involved in an inter-species recombination event involving the antibiotic resistant S. pneumoniae Taiwan19F-14 strain and the S. mitis SK564 strain. In yellow we report the genes coded by the transposon, while in red we highlight the genes that are frameshifted in S. mitis. (XLS) [file pcbi.1002668.s011.xls]

## Sheet: Foglio1
	Locus_tag_Taiwan19F-14	Product	Presence/Absence/Identical
	SPT_1888	conserved hypothetical protein	P
	SPT_1889	conserved hypothetical protein	F
	SPT_1890	conserved hypothetical protein	F
	SPT_1891	conserved hypothetical protein	P
	SPT_1892	conserved hypothetical protein	P
	SPT_1893	hypothetical protein	F
	SPT_1894	type II restriction-modification system regulatory protein, putative	F
	SPT_1895	autolysin (N-acetylmuramoyl-L-alanine amidase) (Mureinhydrolase) (Mucopeptide aminohydrolase) (Cell wall hydrolase	P
	SPT_1896	hypothetical protein	F
	SPT_1897	DNA-damage-inducible protein	P
	SPT_1898	protein RecA	P
	SPT_1899	competence/damage-inducible protein CinA N-domain, putative	P
	SPT_1900	regulator of lytrabc operon	P
	SPT_1901	acetyltransferase, gnat family	P
	SPT_1902	conserved hypothetical protein	P
	SPT_1903	lipoprotein, putative	P
	SPT_1904	transcriptional activator	P
	SPT_1905	conserved hypothetical protein	F
	SPT_1906	hypothetical protein	P
TRANSPOSON	SPT_1907	conjugative transposon protein	A
	SPT_1908	conjugative transposon protein	A
	SPT_1909	ftsk/spoiiie family protein	A
	SPT_1910	transcriptional regulator, Cro/CI family	A
	SPT_1911	conserved domain protein	A
	SPT_1912	conjugative transposon protein	A
	SPT_1913	conjugative transposon membrane protein	A
	SPT_1914	conjugative transposon protein	A
	SPT_1915	conjugative transposon membrane protein	A
	SPT_1916	NLP/P60 family protein	A
	SPT_1917	conjugative transposon protein	A
	SPT_1918	tetracycline resistance determinant leader peptide	A
	SPT_1919	tetracycline resistance protein	A
	SPT_1922	conserved hypothetical protein	I
	SPT_1923	conserved hypothetical protein	I
	SPT_1924	conserved hypothetical protein	I
	SPT_1925	Mel protein	I
	SPT_1926	macrolide-efflux protein	F
	SPT_1927	conserved hypothetical protein	I
	SPT_1928	transcriptional regulator, putative	A
	SPT_1929	sigma-70, region 4 family	A
	SPT_1930	conserved domain protein	A
	SPT_1931	transposase from transposon (Integrase)	A
	SPT_1932	hypothetical protein	A
	SPT_1933	bacteriocin-associated integral membrane protein	A
	SPT_1934	ABC-type antimicrobial peptide transport system, ATPase component	F
	SPT_1935	conserved hypothetical protein	A
	SPT_1936	nucleoside diphosphate kinase (NDK) (NDP kinase)(Abnormal wing disks protein) (Killer of prune protein)	P
	SPT_1937	DNA-directed RNA polymerase, beta' subunit	P
	SPT_1938	DNA-directed RNA polymerase, beta subunit	P
	SPT_1939	hypothetical protein	F
	SPT_1941	hypothetical protein	F
	SPT_1942	CBS domain protein	P
	SPT_1943	DNA-entry nuclease (Competence-specific nuclease)	P
	SPT_1944	conserved domain protein	P
	SPT_1945	UDP-N-acetylglucosamine 1-carboxyvinyltransferase	P
	SPT_1946	conserved hypothetical protein	F
	SPT_1947	ATP-dependent protease La	P
	SPT_1948	pantetheine-phosphate adenylyltransferase	P
	SPT_1949	RNA methyltransferase, RsmD family	P
	SPT_1950	aspartate--ammonia ligase	P
	SPT_1951	hypothetical protein	F
	SPT_1952	membrane protein	P
	SPT_1953	SpoU rRNA Methylase family protein	P
	SPT_1954	acylphosphatase	P
	SPT_1955	membrane protein OxaA 2	P
	SPT_1956	pyruvate formate-lyase 1-activating enzyme	I
	SPT_1957	diaminopimelate decarboxylase	P
Transposon in yellow
Pseudogenes in S. mitis SK564 in red
A= Absent, P=Present, I=Identica, F=Frameshifted
